# Supplementary material for: Comparison of the human microbiome in adults and children with chronic rhinosinusitis
Source: PubMed Central journal article supplement (PMC7710060; doi:10.1371/journal.pone.0242770), 2020-12-02

# ***PlosOne* Supporting Information S1 Appendix**

**Article title: Comparison of the Human Microbiome in Adults and Children with Chronic Rhinosinusitis.**

**Authors: Il-Ho Park, Joong Seob Lee, Joo-Hoo Park, Sung Hun Kang, Seok Min Hong, Il Seok Park, Joo Heung Yoon and Seok Jin Hong**

**The following supporting information is available for this article:**

**S1 Table A. Averaged taxonomic compositions in Genus level of Adult group.**

**S1 Figure A. Species richness indexes.**

**S1 Figure B. Alpha-diversity indexes.**

**S1 Figure C. Averaged taxonomic compositions in Species level of adult group and pediatric group.**

# Table A.

| Genus                            | Proportion |
|----------------------------------|------------|
| Corynebacterium                  | 0.2507981  |
| Staphylococcus                   | 0.1311886  |
| Haemophilus                      | 0.0604578  |
| Fusobacterium                    | 0.0500684  |
| Mycoplasma_g13                   | 0.0416475  |
| Escherichia                      | 0.0361305  |
| Propionibacterium                | 0.029079   |
| Anaerococcus                     | 0.0265404  |
| Peptoniphilus                    | 0.0262038  |
| Bacteroides                      | 0.0234132  |
| Moraxella                        | 0.0178917  |
| Streptococcus                    | 0.0141024  |
| Citrobacter                      | 0.0129738  |
| Prevotella                       | 0.0106526  |
| Unclassified in higher taxonomic | 0.0006087  |
| ETC(under 1% in average)         | 0.1781553  |

# Figure A.

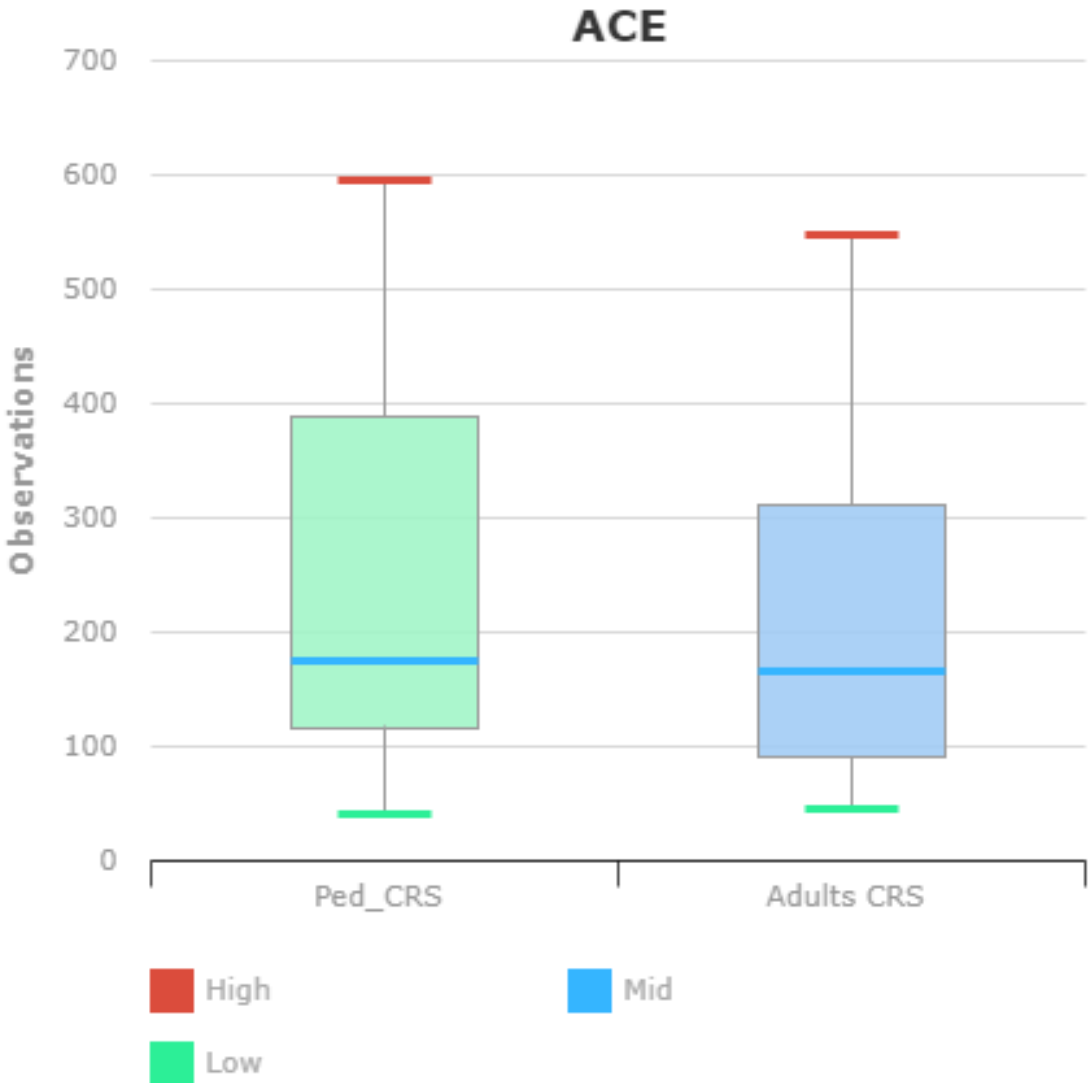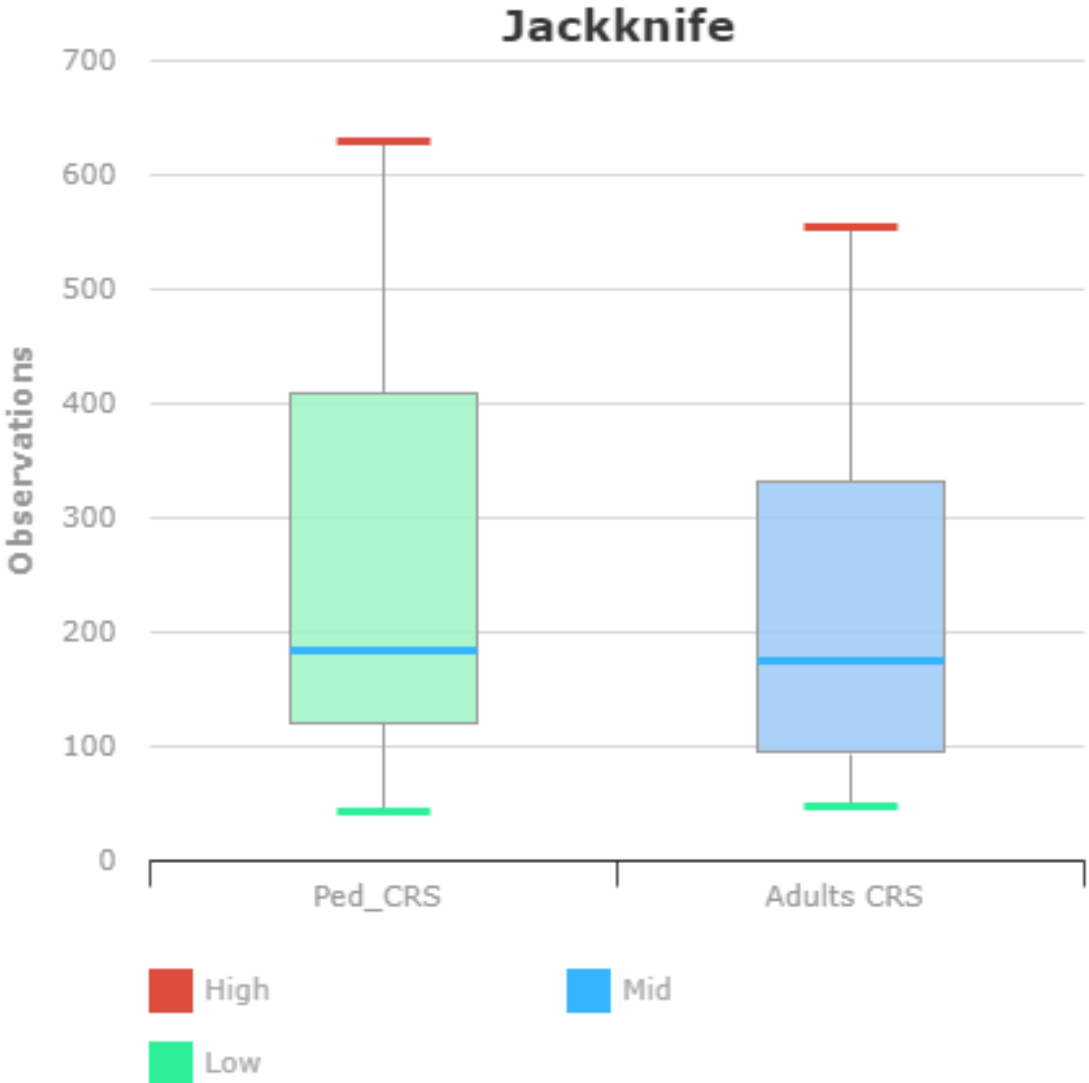

# Figure B.

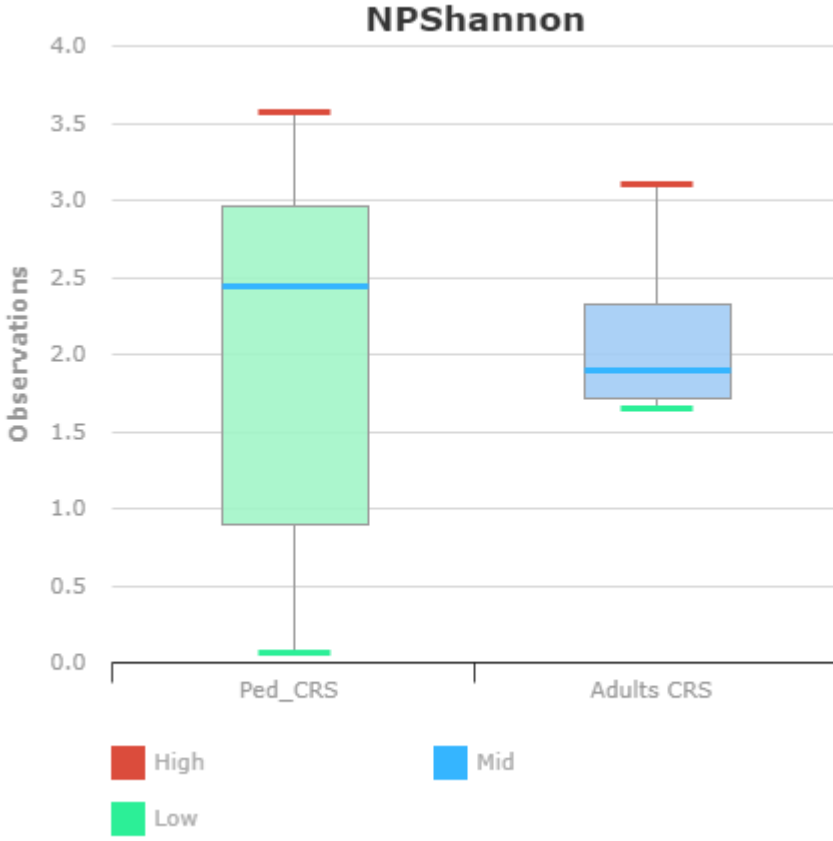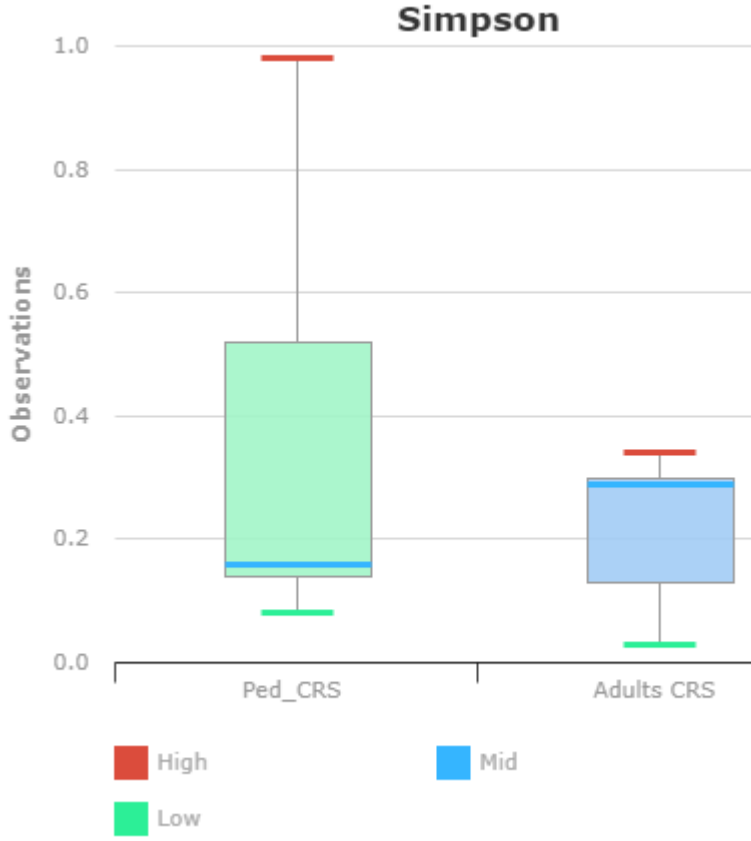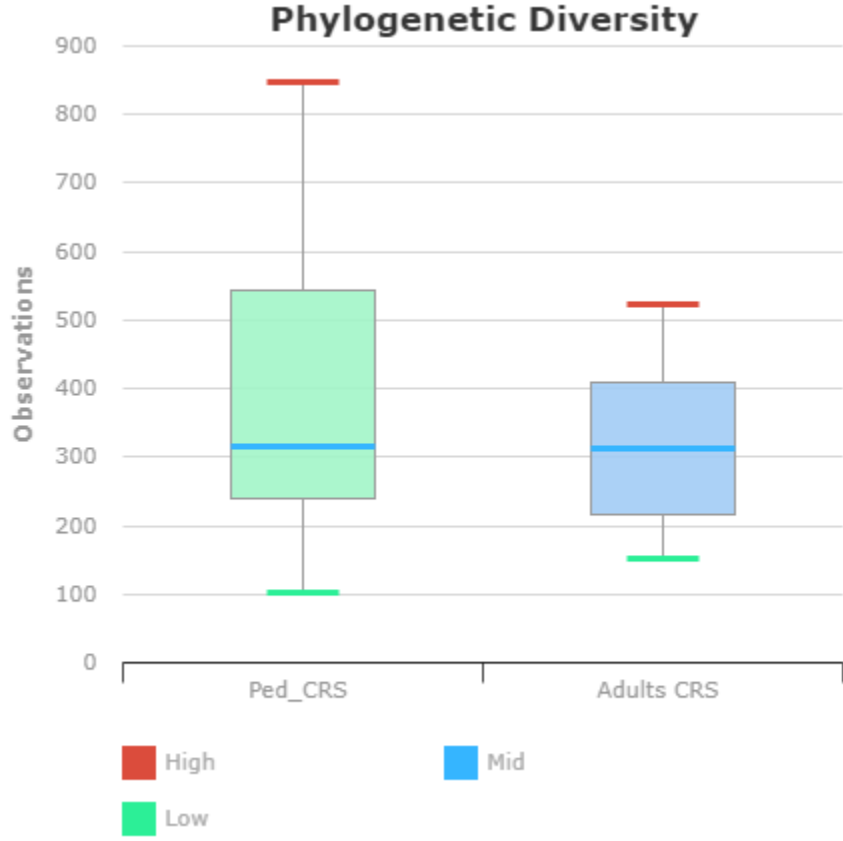

# Figure C

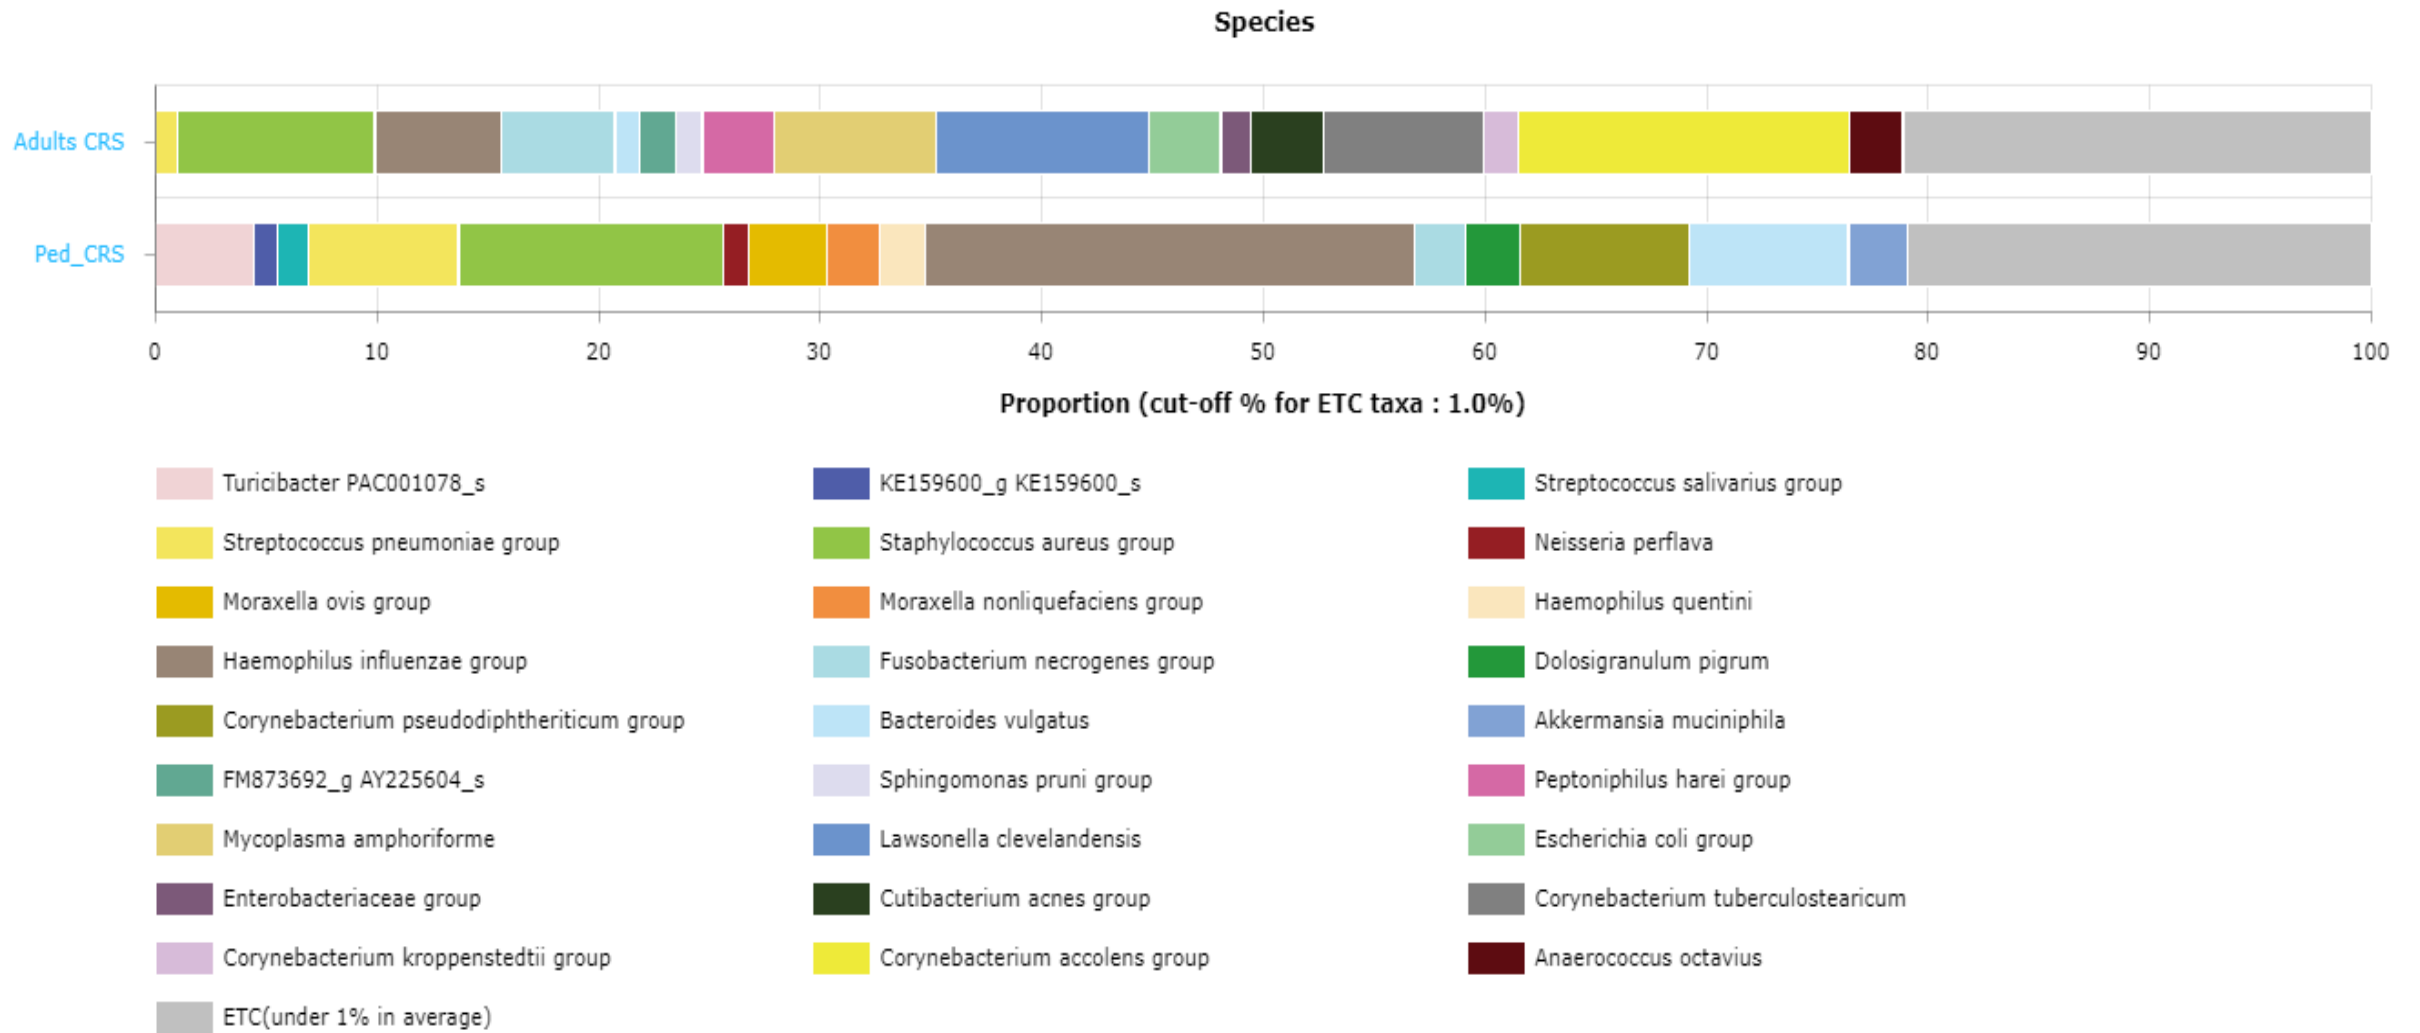

Supplement: pone.0242770.s001.pdf [file pone.0242770.s001.pdf]
